# Supplementary material
Source: publisher figshare collection journal article supplement (https://tandf.figshare.com/ndownloader/files/22898885)
Supplement: Supplementary file 1 [file 22898885]

| **Sr. no** | **Name** | **IUPAC name** | **Strcture** |
| --- | --- | --- | --- |
|  | 6'-debromohamacanthin B | (5*R*)-5-(6-bromo-1*H*-indol-3-yl)-3-(1*H*-indol-3-yl)-5,6-dihydropyrazin-2(1*H*)-one |  |
|  | 6-hydroxydiscodermindole | 3-(2-amino-4,5-dihydro-1*H*-imidazol-4-yl)-2,5-dibromo-1*H*-indol-6-ol |  |
|  | Bromodeoxytopsentin | [5-(6-bromo-1*H*-indol-3-yl)-1*H*-imidazol-2-yl](1*H*-indol-3-yl)methanone |  |
|  | cis-(+)-3,4-DihydrohamacanthinB | (3*S*,5*R*)-3,5-bis(6-bromo-1*H*-indol-3-yl)piperazin-2-one |  |
|  | Dibromodeoxytopsentin | (6-bromo-1*H*-indol-3-yl)[5-(6-bromo-1*H*-indol-3-yl)-1*H*-imidazol-2-yl]methanone |  |
|  | Discodermindole | 5-(2,5-dibromo-1*H*-indol-3-yl)-4,5-dihydro-1*H*-imidazol-2-amine |  |
|  | Dragmacidin | 6,7-dibromo-3-[(2*S*,5*R*)-5-(6-bromo-1*H*-indol-3-yl)-4-methylpiperazin-2-yl]-1*H*-indol-4-ol |  |
|  | Hamacanthin B | (5*S*)-3,5-bis(6-bromo-1*H*-indol-3-yl)-5,6-dihydropyrazin-2(1*H*)-one |  |
|  | Isobromodeoxytopsentin | (6-bromo-3a,7a-dihydro-1*H*-indol-3-yl)[5-(6-bromo-1*H*-indol-3-yl)-1*H*-imidazol-2-yl]methanone |  |
|  | Isobromotopsentin | (6-bromo-1*H*-indol-3-yl)[5-(1*H*-indol-3-yl)-1*H*-imidazol-2-yl]methanone |  |
|  | Spongotine A | [5-(6-bromo-1*H*-indol-3-yl)-4,5-dihydro-1*H*-imidazol-2-yl](1*H*-indol-3-yl)methanone |  |
|  | Spongotine B | (6-bromo-1*H*-indol-3-yl)[5-(1*H*-indol-3-yl)-4,5-dihydro-1*H*-imidazol-2-yl]methanone |  |
|  | Spongotine C | (6-bromo-1*H*-indol-3-yl)[4-(6-bromo-1*H*-indol-3-yl)-4,5-dihydro-1*H*-imidazol-2-yl]methanone |  |
|  | Topsentin A | (1*H*-indol-3-yl)[5-(1*H*-indol-3-yl)-1*H*-imidazol-2-yl]methanone |  |
|  | Topsentin B1 | (6-hydroxy-1*H*-indol-3-yl)[5-(1*H*-indol-3-yl)-1*H*-imidazol-2-yl]methanone |  |
|  | Topsentin B2 | [5-(6-bromo-1*H*-indol-3-yl)-1*H*-imidazol-2-yl](6-hydroxy-1*H*-indol-3-yl)methanone |  |
|  | Topsentin C | 3,6-bis(6-bromo-1*H*-indol-3-yl)-1-methyl-5,6-dihydropyrazin-2(1*H*)-one |  |
|  | Topsentin D | (1*H*-indol-3-yl)[5-(1*H*-indol-3-yl)-4,5-dihydro-1*H*-imidazol-2-yl]methanone |  |
